# Supplementary material for: Metal-mediated fabrication of new functional G-quartet-based supramolecular nanostructure and potential application as controlled drug release system
Source: Royal Society of Chemistry journal article supplement (doi:10.1039/c1sc00109d), 2011-01-01
Supplement: c1sc00109d.pdf [file c1sc00109d.pdf]

**Metal-mediated Fabrication of New Functional G-quartet-based Supramolecular Nanostructure and Potential Application as Controlled Drug Release System**

Dan Hu, Jinsong Ren\* and Xiaogang Qu\*

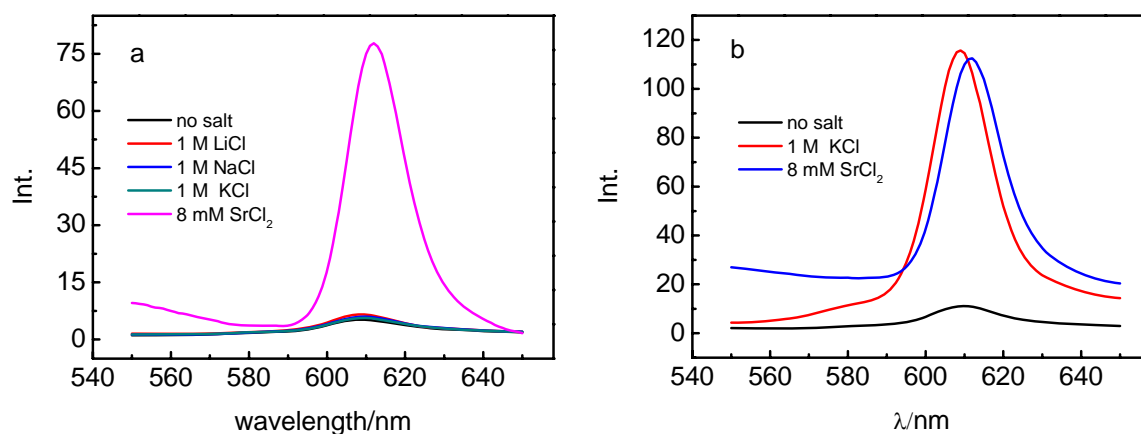

**Figure S1.** Fluorescence spectra of NMM mixed with 5'-GMP in deionized water upon addition of different salts. (a) Control (black), 1 M LiCl (red), 1 M NaCl (blue), 1 M KCl (cyan) and 8 mM SrCl<sub>2</sub> (blue). [NMM] =  $2 \times 10^{-6}$  M, [GMP] =  $2 \times 10^{-2}$  M. (b) Control (black), 1 M KCl (red), 8 mM SrCl<sub>2</sub> (blue). [NMM] =  $2 \times 10^{-6}$  M, [GMP] =  $1 \times 10^{-1}$  M.

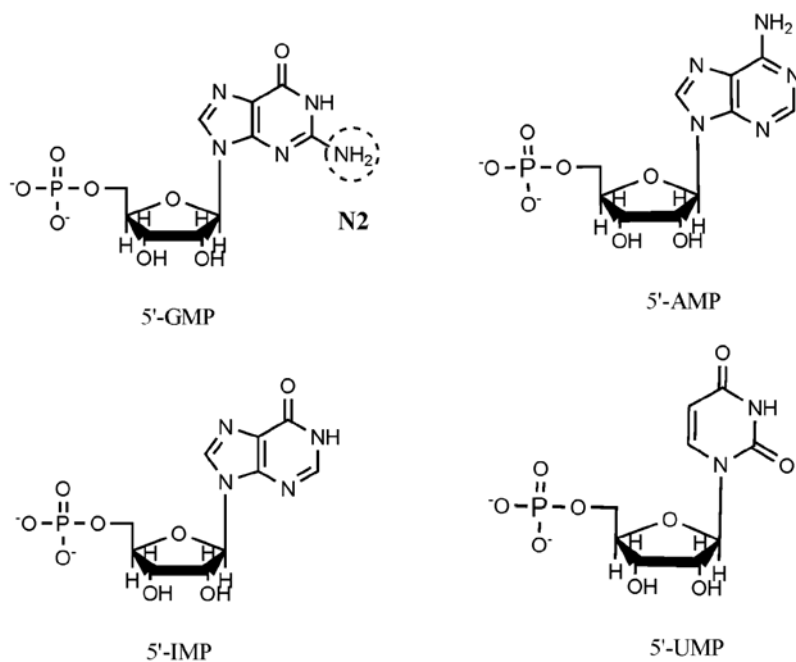

**Figure S2.** Structures of the nucleotides used for these studies.

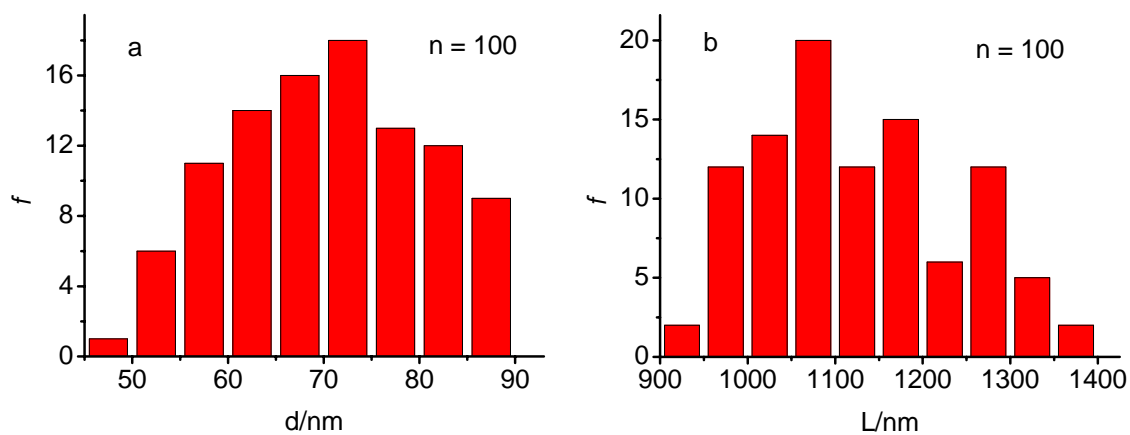

**Figure S3.** Histograms showing the width (a) and length (b) of a sample with 100 distinct wires

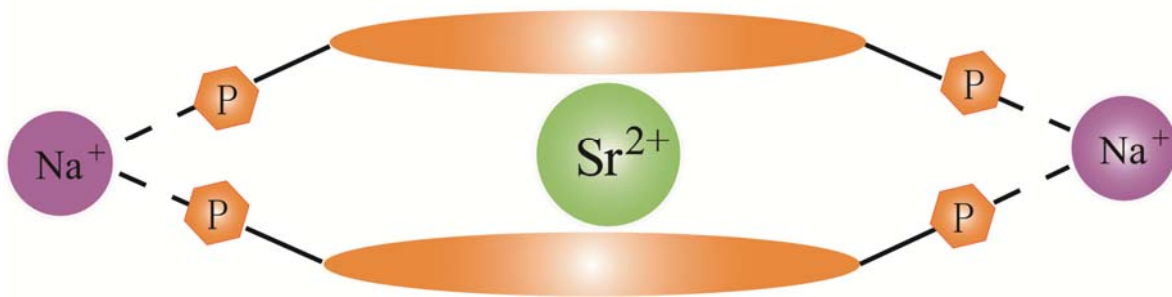

**Figure S4.** Proposed binding site for Sr<sup>2+</sup> in ordered 5'-GMP octamers. The binding site defined by the eight O6 atoms of neighboring guanine bases are believed to be highly Sr<sup>2+</sup>-specific structure-directing sites.

**Table S1.** Chemical shift of excessive NaCl (free NaCl), Na<sup>+</sup> bound to the phosphate groups (surface Na<sup>+</sup> ions) and Na<sup>+</sup> ions residing inside the G-quartet channel (channel Na<sup>+</sup> ions) in solid-state <sup>23</sup>Na NMR spectra.

| Ion type \ Sample type               | Free Na <sup>+</sup> ions | Surface Na <sup>+</sup> ions | Channel Na <sup>+</sup> ions |
|--------------------------------------|---------------------------|------------------------------|------------------------------|
| Na-gel <sup>1</sup>                  | 7 ppm                     | -1 ppm                       | -19 ppm                      |
| Lipophilic G-quadruplex <sup>2</sup> | —                         | —                            | -18 ppm                      |
| Na-gel <sup>3</sup>                  | 7 ppm                     | -4 ppm                       | -19 ppm                      |
| Na-gel <sup>4</sup>                  | 7 ppm                     | -5 ppm                       | -20 ppm                      |
| Na-gel(in our manuscript)            | No signal                 | -7.5 ppm                     | -21.5 ppm                    |
| Na-Sr gel(in our manuscript)         | 6.8 ppm                   | -8.2 ppm                     | No signal                    |

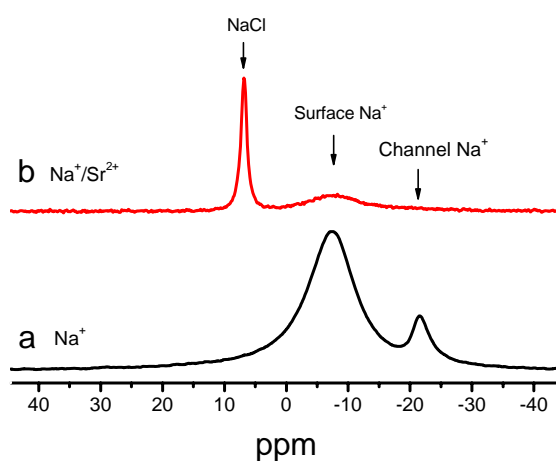

**Figure S5.** Solid-state <sup>23</sup>Na NMR MAS spectra of (a) Na<sub>2</sub> (5'-GMP) gel. (b) Na<sub>2</sub> (5'-GMP)/Sr<sup>2+</sup> nanowires.

Solid-state  $^{23}\text{Na}$  NMR approach is a useful technique for detecting other metal-directed self-assembly systems as well as in nucleic acids. In this study, we apply  $^{23}\text{Na}$  magic-angle spinning (MAS) to  $\text{Na}_2$  (5'-GMP)/ $\text{Sr}^{2+}$  nanowires. *Figure S5* shows portions of the solid state  $^{23}\text{Na}$  NMR spectra for  $\text{Na}_2$  (5'-GMP) in the absence or presence of 8 mM  $\text{Sr}^{2+}$ . As can be seen in *Figure S5a*, the  $^{23}\text{Na}$  NMR signal at approximately -7.5 ppm is attributed to the  $\text{Na}^+$  ions bound to the phosphate groups (denoted as the surface  $\text{Na}^+$  ions in this study), and the small peak at -21.5 ppm is due to the  $\text{Na}^+$  ions residing inside the G-quartet channel (denoted as the channel  $\text{Na}^+$  ions). This  $^{23}\text{Na}$  chemical shift value is in excellent agreement with the NMR signature obtained for channel  $\text{Na}^+$  cations by solid-state  $^{23}\text{Na}$  NMR.<sup>1-4</sup> In the case of  $\text{Na}_2$  (5'-GMP)/ $\text{Sr}^{2+}$  nanowires, as shown in *Figure S5b*, the sharp peak centered at  $\delta = 6.8$  ppm is assigned to the presence of excessive NaCl in the nanowires (denoted as free  $\text{Na}^+$  ions in this study). The small peak at  $\delta = -8.2$  ppm is attributed to surface  $\text{Na}^+$  ions. It is worth noting that the signal at -21.5 ppm which is characteristic of the channel  $\text{Na}^+$  ions disappeared completely. This implies that the presence of  $\text{Sr}^{2+}$  inhibits the entering of  $\text{Na}^+$  into the G-quadruplex channel. Thus, the  $^{23}\text{Na}$  NMR signal associated with the free  $\text{Na}^+$  ions appeared. Moreover, the fluorescence enhancement of NMM indicates the existence of G-quartet structures in  $\text{Na}_2$  (5'-GMP)/ $\text{Sr}^{2+}$  nanowires. These results unambiguously demonstrate that the G-quartet structures are promoted by  $\text{Sr}^{2+}$  ions, which is consistent with recent crystallographic and NMR studies that  $\text{Sr}^{2+}$  ions are observed in every other guanine tetrad plane, sitting on the fourfold axis and associated to the eight O6 atoms of neighboring guanine bases.<sup>5-7</sup>

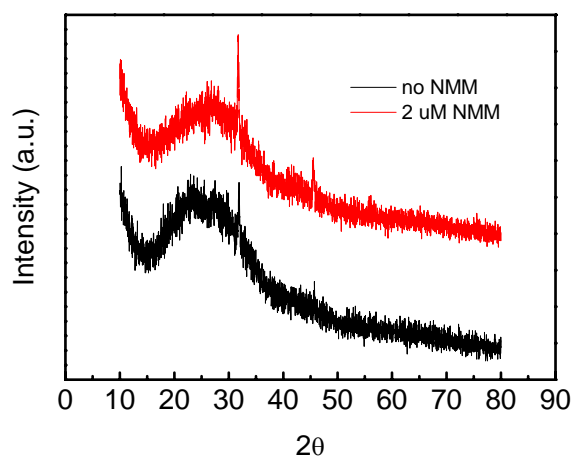

**Figure S6.** XRD patterns of 5'-GMP /Sr<sup>2+</sup> nanowires prepared in the absence (bottom) and presence (top) of 2 μM NMM.

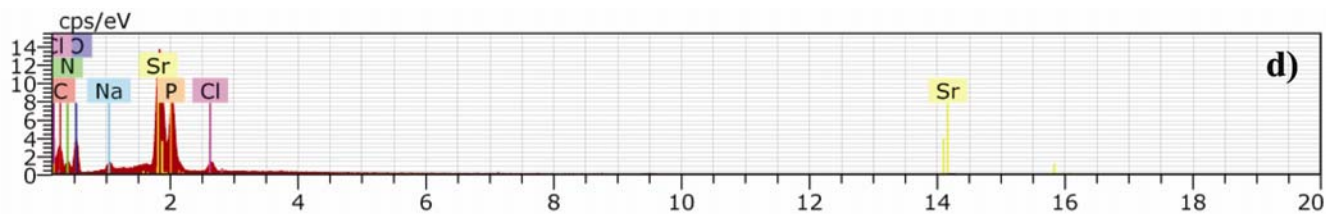

**Figure S7.** EDX data of synthesized functional nanowires, [NMM] =  $2 \times 10^{-6}$  M, [GMP] =  $2 \times 10^{-2}$  M.

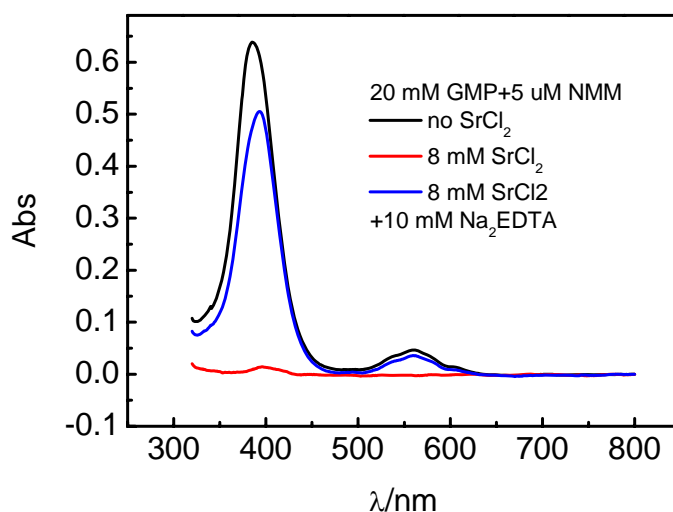

**Figure S8.** Absorbance spectra of the supernatant of the mixture of NMM and 5'-GMP in deionized water, and the following: no extra agent (black), 8 mM SrCl<sub>2</sub> (red), or 8 mM SrCl<sub>2</sub> plus 10 mM Na<sub>2</sub>EDTA (blue) at ambient temperature.

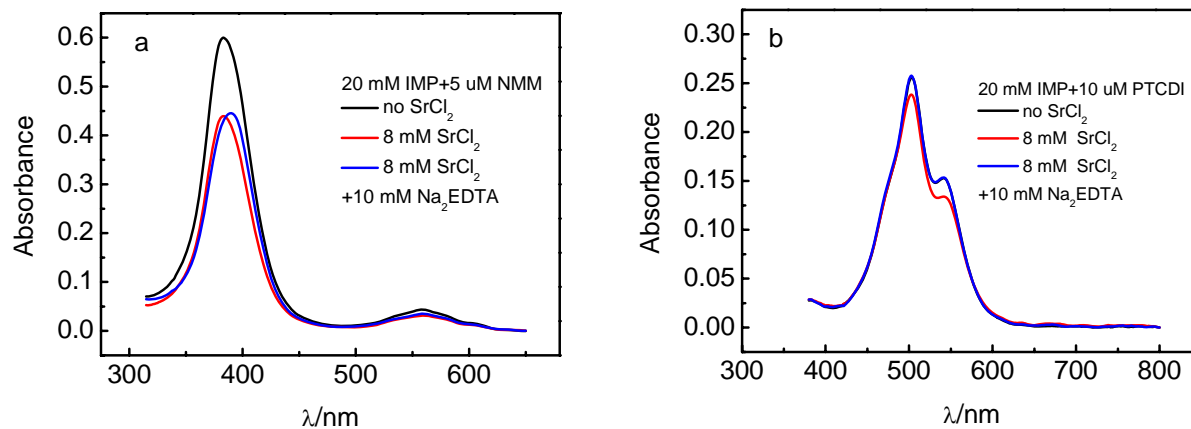

**Figure S9.** Absorbance spectra of the supernatant of the mixture of (a) 5  $\mu$ M NMM and (b) 10  $\mu$ M cationic PTCDI derivative and 5'-IMP in deionized water, and the following: no extra agent (black), 8 mM SrCl<sub>2</sub> (red), or 8 mM SrCl<sub>2</sub> plus 10 mM Na<sub>2</sub>EDTA (blue) at ambient temperature. [IMP] =  $2 \times 10^{-2}$  M.

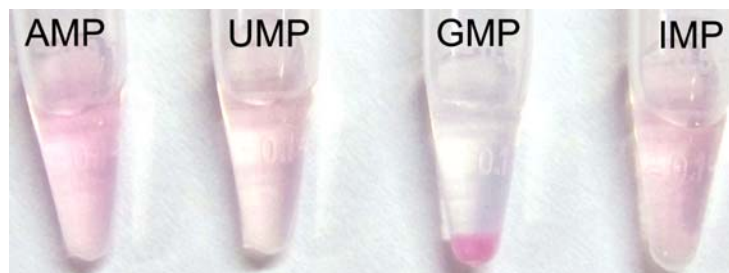

**Figure S10.** Encapsulation of cationic PTCDI derivative into four nucleotides mediated by 8 mM  $\text{Sr}^{2+}$ . [PTCDI derivative] = 10  $\mu\text{M}$ . [AMP] = [UMP] = [GMP] = [IMP] =  $2 \times 10^{-2}$  M.

(a)

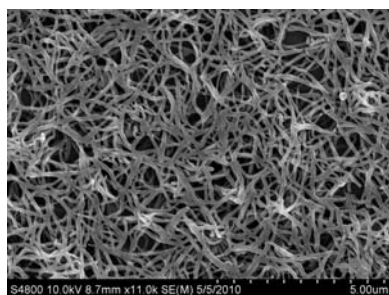

(b)

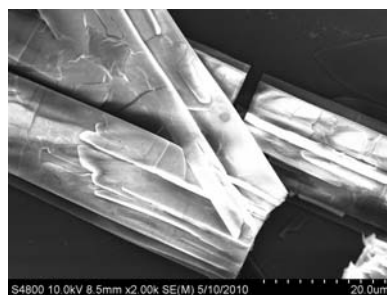

(c)

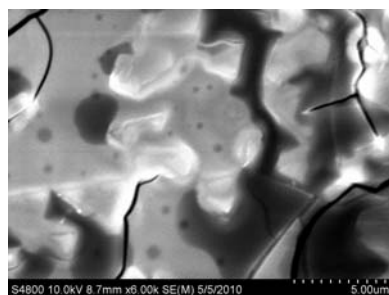

(d)

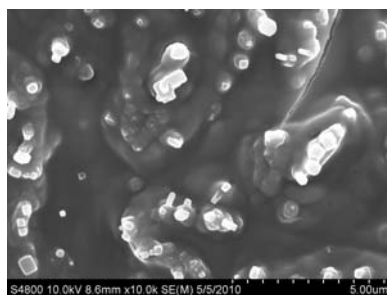



**Figure S11.** SEM images of NMM mixed with (a) 5'-GMP, (b) 5'-IMP, (c) 5'-AMP, (d) 5'-UMP upon the addition of 8 mM SrCl<sub>2</sub> in deionized water. [NMM] = 2×10<sup>-6</sup> M, [GMP] = [IMP] = [AMP] = [UMP] = 2×10<sup>-2</sup> M.

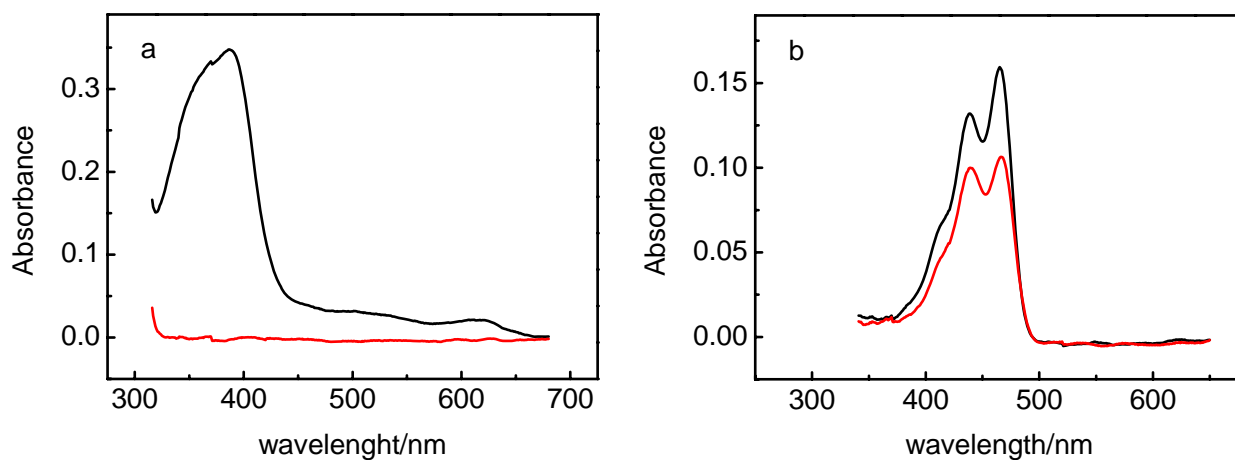

**Figure S12.** Encapsulation of (a) hemin and (b) perylene tetracarboxylic acid into the Sr<sup>2+</sup>/GMP nanowires. Absorbance spectra of the supernatant of the mixture of 10 μM hemin or perylene tetracarboxylic acid and 5'-GMP in deionized water, and the following: no extra agent (black), 8 mM SrCl<sub>2</sub> (red), [GMP] = 2×10<sup>-2</sup> M.

(a)

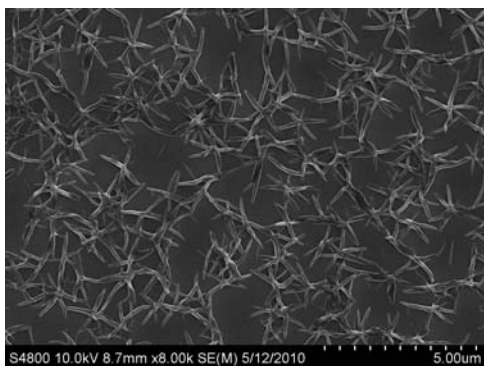

(b)

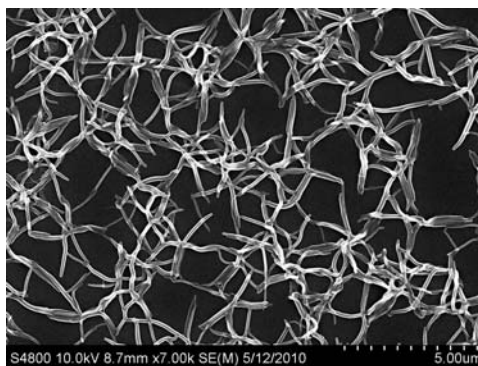

(c)

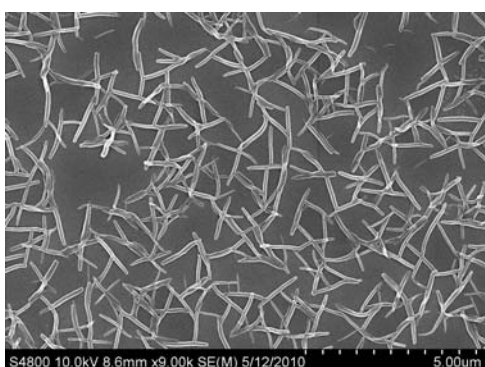

(d)

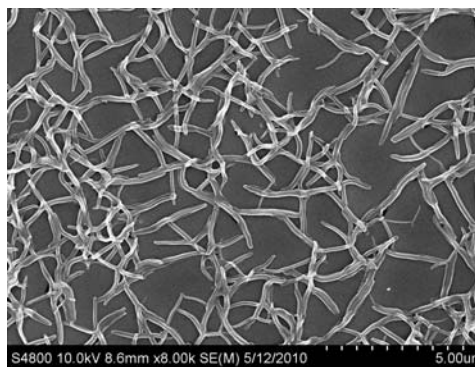

(e)

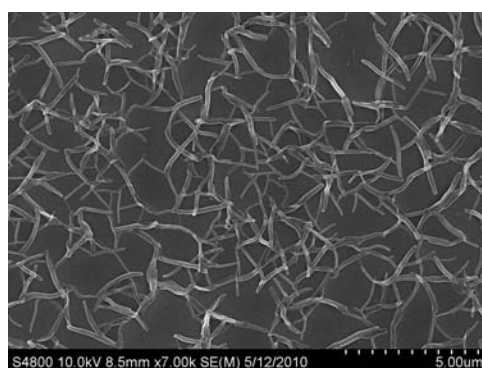

**Figure S13.** SEM images of various amounts of NMM (a) 0  $\mu\text{M}$ , (b) 2  $\mu\text{M}$ , (c) 5  $\mu\text{M}$ , (d) 10  $\mu\text{M}$ , (e) 20  $\mu\text{M}$ , mixed with 5'-GMP and  $\text{SrCl}_2$  in deionized water.  $[\text{GMP}] = 2 \times 10^{-2} \text{ M}$ ,  $[\text{SrCl}_2] = 8 \text{ mM}$ .

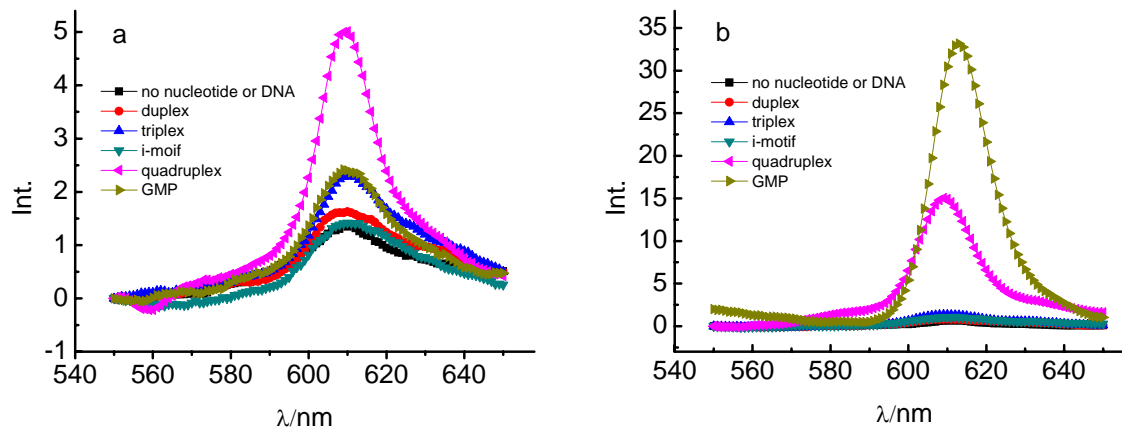

**Figure S14.** Fluorescence spectra of NMM with various DNA forms and GMP (a) before and (b) after addition of 8 mM SrCl<sub>2</sub>. [NMM] =  $2 \times 10^{-6}$  M, [duplex] = [triplex] = [*i*-motif] = [quadruplex] =  $1 \times 10^{-6}$  M, [GMP] =  $2 \times 10^{-2}$  M.

## Reference

1. G. Wu and A. Wong, *Chem. Commun.*, 2001, 2658-2659.
2. A. Wong, J. C. Fettinger, S. L. Forman, J. T. Davis and G. Wu, *J. Am. Chem. Soc.*, 2002, **124**, 742-743.
3. A. Wong and G. Wu, *J. Am. Chem. Soc.*, 2003, **125**, 13895-13905.
4. G. Wu and A. Wong, *Biochem. Biophys. Res. Commun.*, 2004, **323**, 1139-1144.
5. X. Shi, J. C. Fettinger and J. T. Davis, *Angew. Chem. Int. Ed.*, 2001, **40**, 2827-2831.
6. J. Deng, Y. Xiong and M. Sundaralingam, *Proc. Natl. Acad. Sci. U. S. A.*, 2001, **98**, 13665-13670.
7. R. Ida, I. C. Kwan and G. Wu, *Chem. Commun.*, 2007, 795-797.
